# Supplementary material
Source: publisher figshare collection journal article supplement (https://tandf.figshare.com/ndownloader/files/14427713)
Supplement: Supplementary file 1 [file 14427713]

# Supplementary Information Item 1: Search strategy and the data fields collected and coded

Free -text search strategy:

(Alpaca OR Amphibian OR Animal OR Aquarium OR Aviaries OR Aviary OR Bee OR Bird OR Bovine OR Budgerigar OR Budgie OR Calf OR Calves OR Camel OR Canaries OR Canary OR Canine OR Caprine OR Carp OR Cat OR Catteries OR Cattery OR Cattle OR Chameleon OR Chicken OR Chinchilla OR Cockatiel OR Cockatoo OR Cow OR Crab OR Deer OR Dog OR Donkey OR Dove OR Duck OR Equine OR Farm OR Feline OR Ferret OR Fish OR Fishes OR Foal OR Fowl OR Frog OR Geese OR Goat OR Goldfish OR Goldfishes OR Goose OR Groomer OR Grooming OR Guinea OR Hamster OR Horse OR Iguana OR Kennel OR Kitten OR Lamb OR Liveries OR Livery OR Lizard OR Llama OR Lorikeet OR Lovebird OR Macaw OR Mammal OR Mice OR Mouse OR Ovine OR Parakeet OR Parrot OR Peacock OR Pet OR Pig OR Pigeon OR Piglet OR Ponies OR Pony OR Porcine OR Pup OR Puppies OR Puppy OR Rabbit OR Ranch OR Ranches OR Rat OR Reptile OR Rodent OR Salamander OR Sheep OR Snake OR Spider OR Stable OR Stick insect OR Terrapin OR Tortoise OR Turkey OR Turtle OR Vet* OR Wildlife OR Zoo).

| Original NSWPIC data |  | Data coding in paper |
| --- | --- | --- |
| Caller details | unique caller ID | Unique case |
|  | call time |  |
|  | call date | Year (2014, 2015, or 2016);  Month (individual January to December);  Season (December/January/February=summer, March/April/May=autumn, June/July/August=winter, September/October/November=spring) |
|  | caller background categorised as either ambulance, doctor, emergency department doctor, family member, other medical professional, self, vet, carer, counselling service, friend, general practitioner (GP), group home, intensive care unit doctor, nurse, pharmacist, other or unknown; | Caller (Ambulance, doctor, emergency department doctor, other medical professional, carer, counselling service, general practitioner, group home, intensive care unit doctor, nurse and pharmacist = ‘human health professional’,  Family member = family  Self = individual  Friend = other lay person  Vet = veterinarian  Other and unknown = missing) |
| Location details | State ID |  |
|  | Suburb |  |
|  | Postcode |  |
|  | Hospital name, if appropriate |  |
| Patient details | age (years and months and categorised as either infant, toddler, child, adolescent, adult or elderly) | Age (infant = 4 weeks to < 1 year, toddler = 1 to 4 years, child = 5 to 14 years, adolescent = 15 to 19 years, adult = 20 to 74 years and elderly = ≥ 75 years, and where paediatric = infant to adolescent inclusive) |
|  | Weight (kilograms) |  |
|  | Sex (female, male, unknown) | Sex (female, male) |
| Exposure details | Exposure type categorised as either accidental, adverse reaction, deliberate self-poisoning, food poisoning, intentional:other, other, pregnancy, recreational, therapeutic error, unknown, or work place. | Exposure ("Unintentional" ="Accidental", “Adverse reaction" , “Food poisoning" , "Other" , "Pregnancy" , "Therapeutic Error" , "Work place"  "Deliberate" ="deliberate-self poisoning"  "Other_intentional" ="Intentional:other" ="recreational"  “Unknown" ="Unknown") |
|  | Initial symptom assessment categorised as either related symptomatic, unrelated symptomatic, asymptomatic, not known if related or symptoms unknown. | Symptomatic (“Yes" ="Related Symptomatic"  “No" ="Asymptomatic" ="Unrelated Symptomatic") |
|  | Handling categorised as at GP, GP refer, in hospital, hospital refer, stay at home, unknown or other. | Handling ("Home" = "Stay at Home"  "Hospital" ="Hospital Refer" ="In Hospital"  "GP" ="At GP Surgery" ="GP Refer")  Hospitalisation if Handling = Hospital |
|  | Time since exposure (free text) |  |
|  | Route categorised as aural, buccal/sublingual, dermal, ingestion, inhalation/nasal, ocular, parenteral or unknown. |  |
|  | Dose taken (free text) |  |
|  | Product code and ID |  |
|  | Product type and ID |  |
|  | Product name (pre-specified drop-down) |  |
|  | Substance (free text) | Product intention categorised based on WHO ATC codes |
|  | Advice (free text) | Animal species was coded from the free-text or from the product intention ("Companion" ="Cat” "Cat or dog" "Dog" "Small animal"  "Livestock" ="Alpaca" "Camel" "Cow" "Cow or goat or sheep" "Cow or horse" "Cow or horse or pig or sheep" "Cow or pig" "Cow or pig or sheep" "Cow or sheep" "Goat" "Goat or sheep" "Horse" "Pig" "Sheep"  "Fish" ="Fish"  "Bird" ="Bird" "Chick" "Chicken" "Duck" "Goose" "Pigeon" "Quail" "Reptile" ="Lizard" "Reptile" "Snake"  "Rodents/lagomorphs/laboratory animals" ="Laboratory" "Guinea pig" “Mouse" "Rabbit" "Rat"  "Wild" ="Wombat") and categorised at the individual level at every level specified  Intended route of application  Manufacturer was coded from the free-text or from matching the product details.  Brand was coded from the free-text or from matching the product details.  Product was coded from the free-text or from matching the product details.  Circumstances, where adult exposures were categorised as: 1) occurring during administration to the animal, 2) mistaken product identity applied to self, 3) mistaken product identity applied by other, 4) intentional to self, or 5) intentional by other, and where paediatric exposures were categorised as: 1) accessing the product packaging, 2) eating pet food containing product, 3) touching the pet, 4) unspecified unintentional where all 4 were also sub-categorised as ‘exploratory behaviour’, 5) intentional to self, 6) intentional by other, where both were also sub-categorised as ‘intentional’, and finally 7) therapeutic error  Multipharmacy exposure, categorised as yes or no  Multiple routes of exposures, categorised as yes or no |
